# Supplementary material for: CREB1K292 and HINFPK330 as Putative Common Therapeutic Targets in Alzheimer’s and Parkinson’s Disease
Source: PubMed Central journal article supplement — ACS Omega. 2021 Dec 16;6(51):35780–98. doi: 10.1021/acsomega.1c05827 (PMC8717564; doi:10.1021/acsomega.1c05827), 2021-12-16
Supplement: ao1c05827_si_001.pdf [file ao1c05827_si_001.pdf]

*Research Paper*

**CREB1<sup>K292</sup> and HINFP<sup>K330</sup> as putative common therapeutic targets in Alzheimer's and Parkinson's disease**

**Rohan Gupta<sup>1</sup> and Pravir Kumar<sup>1,\*</sup>**

<sup>1</sup>Molecular Neuroscience and Functional Genomics Laboratory, Department of Biotechnology, Delhi Technological University (Formerly DCE), Delhi 110042

\*Author to whom correspondence should be addressed:

**Pravir Kumar, PhD**

*Professor and Head, Department of Biotechnology*

*Molecular Neuroscience and Functional Genomics Laboratory*

*Former Dean, Delhi Technological University (Formerly Delhi College of Engineering)*

*Former Faculty, Tufts University School of Medicine, Boston, MA, USA*

*Room# FW4TF3, Mechanical Engineering Building*

*Shahbad Daulatpur, Bawana Road, Delhi 110042; Phone: +91- 9818898622*

*Email: [pravirkumar@dtu.ac.in](mailto:pravirkumar@dtu.ac.in); [kpravir@gmail.com](mailto:kpravir@gmail.com)*

*<https://www.ncbi.nlm.nih.gov/myncbi/1DW465XG9bp5p/bibliography/public/>*

*<https://scholar.google.co.in/citations?user=WVLI4i4AAAAJ&hl=en>*

**ORCID ID:** 0000-0001-7444-2344; **Scopus ID:** 14831447800; **ISI Research ID:** B-2164-2015

SUPPLEMENTARY FIGURES

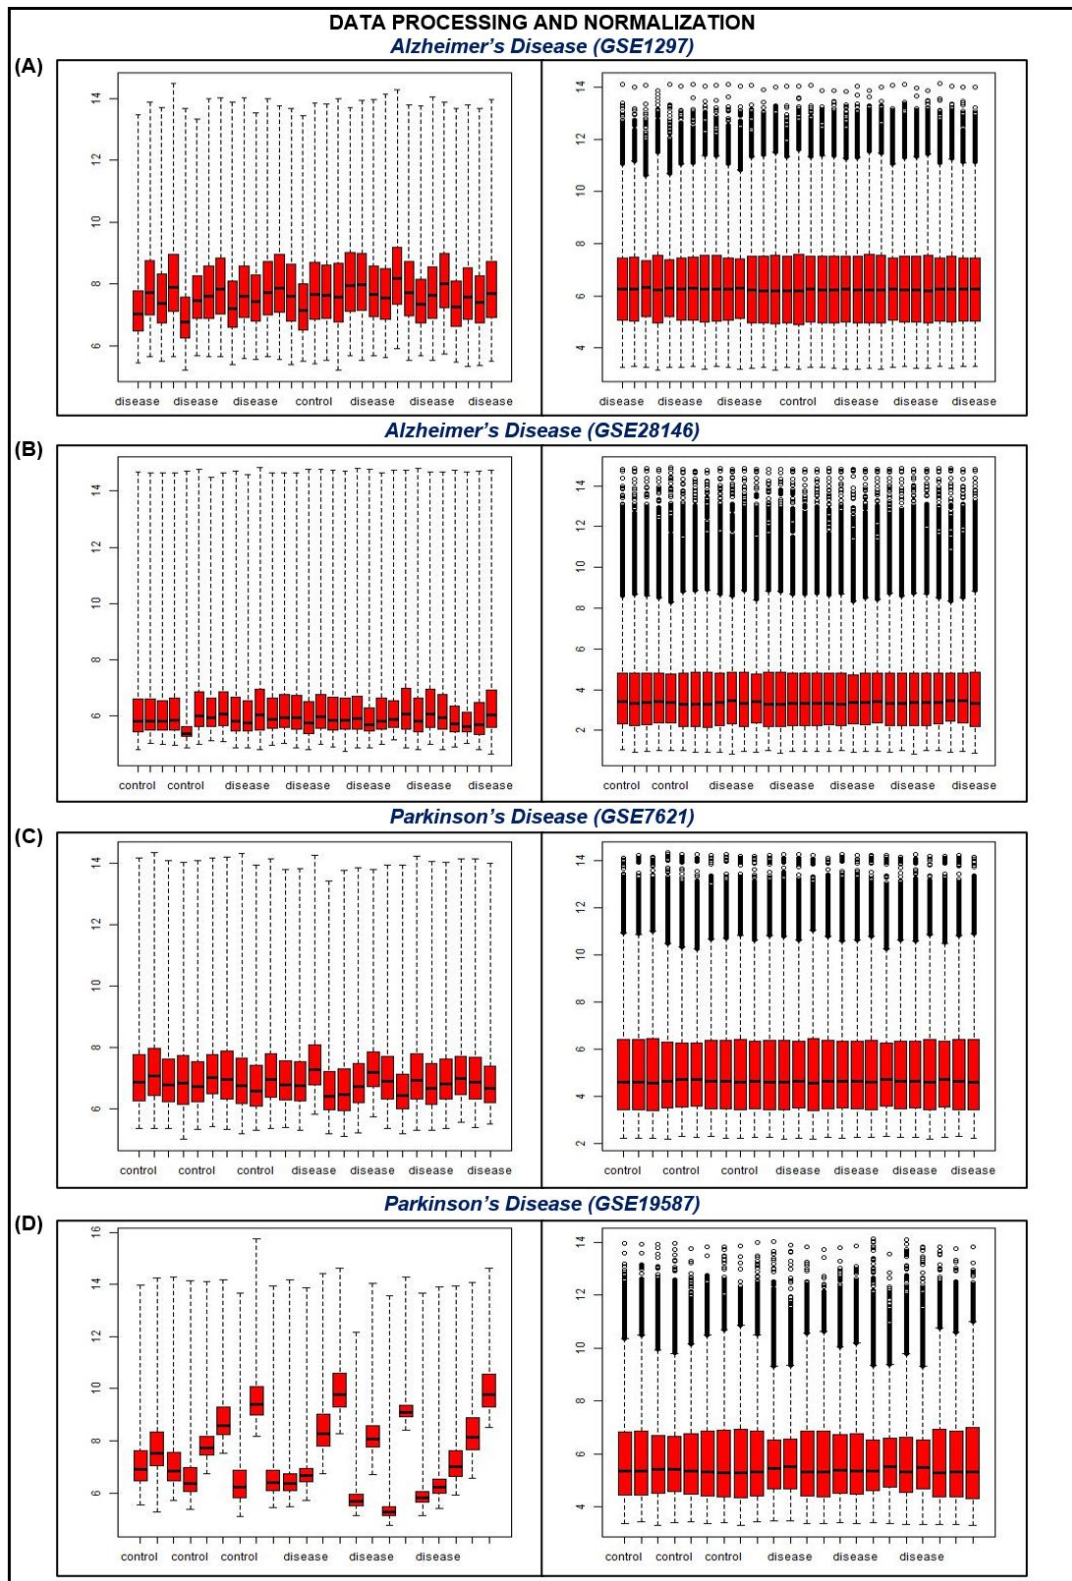

Figure S1: Box plots of Alzheimer's disease (GSE1297 and GSE28146) and Parkinson's disease (GSE7621 and GSE19587) before and after normalization of microarray datasets.

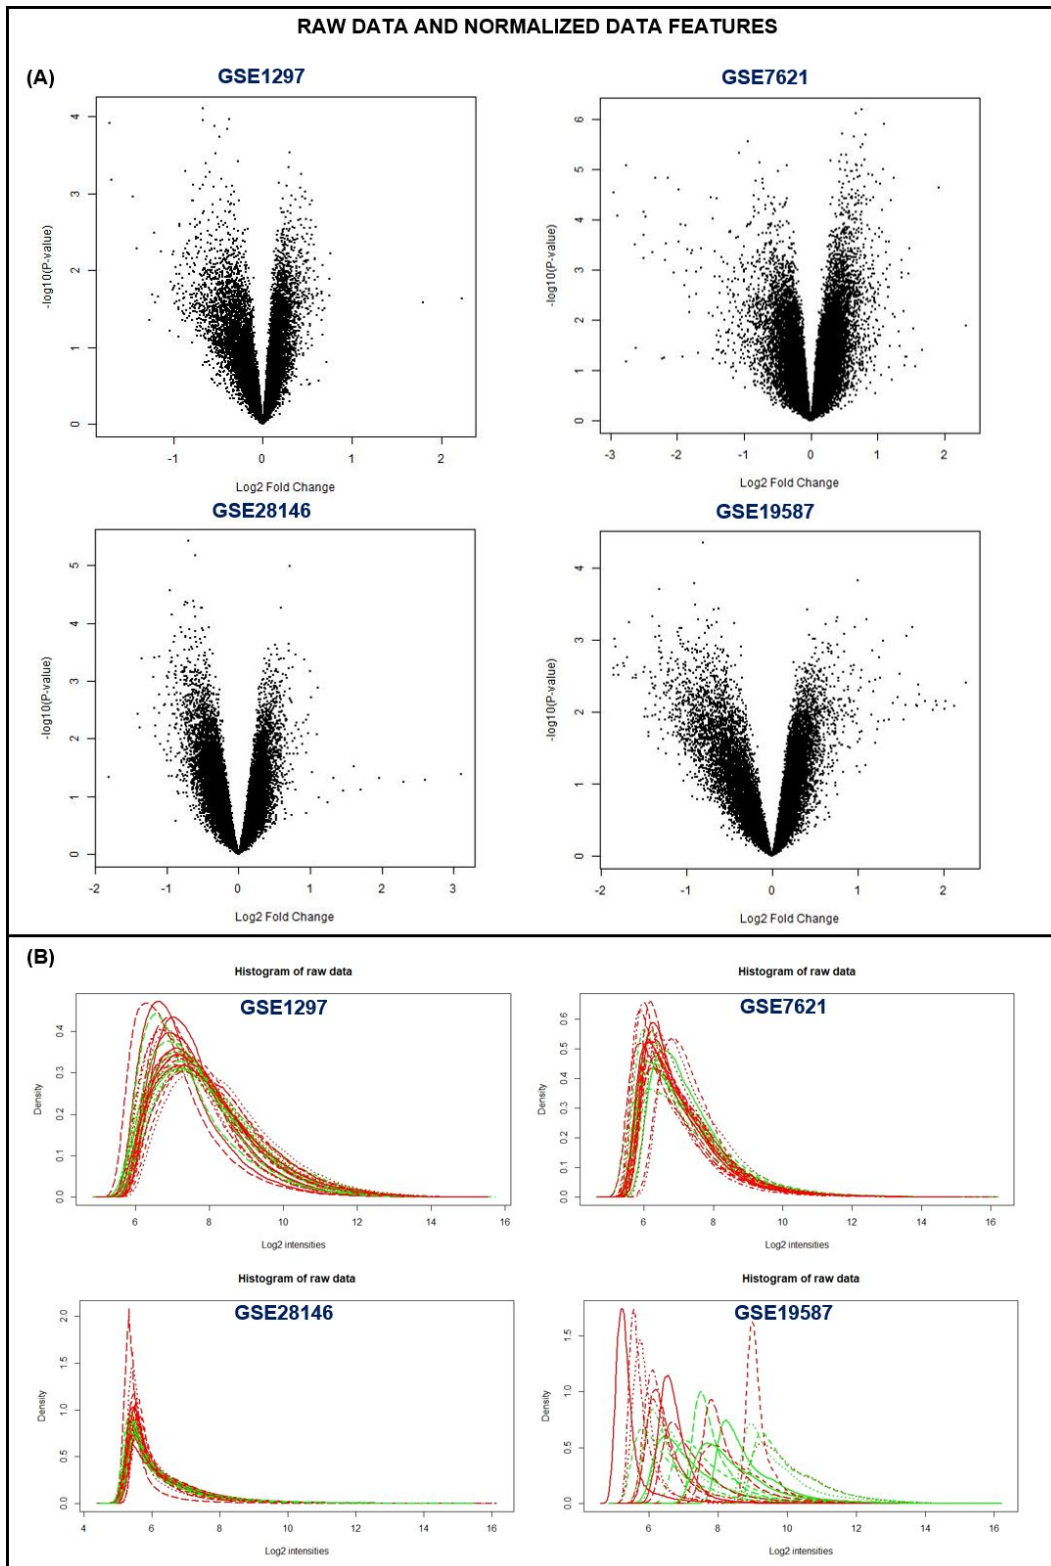

**Figure S2: (A) Volcano plots of publicly available microarray datasets for GSE1297, GSE28146, GSE7621, and GSE19587 (B) histograms of microarray datasets of Alzheimer's disease (GSE1297 and GSE28146) and Parkinson's disease (GSE7621 and GSE19587).**

RELATIVE EXPRESSION OF GENES WITH RESPECT TO HISTONE ACETYLATION

| Genes   | CDC42 | TUBB4B | CD44   | FGFR1 | NUMA1 | NFIA  | INPP5D | NUP93 | USP5  | ARHGEF9 | MYO5A |
|---------|-------|--------|--------|-------|-------|-------|--------|-------|-------|---------|-------|
| H2AK5   | 0     | 0      | 0      | 0.091 | 0     | 0     | 0      | 0.178 | 0.178 | 0       | 0     |
| H2BK5   | 0.393 | 0      | 0      | 0     | 0.393 | 0     | 0      | 0.393 | 0     | 0.393   | 0.393 |
| H2BK12  | 0     | 0      | 0.314  | 0.239 | 0.314 | 0     | 0      | 0.135 | 0.314 | 0       | 0.314 |
| H2BK15  | 0     | 0      | 0.2    | 0.153 | 0.2   | 0     | 0      | 0.152 | 0.2   | 0       | 0.2   |
| H2BK20  | 0     | 0      | 0.0965 | 0.096 | 0     | 0     | 0      | 0     | 0     | 0.096   | 0     |
| H2BK120 | 0.348 | 0      | 0.348  | 0.174 | 0.174 | 0     | 0      | 0.347 | 0.174 | 0.174   | 0.174 |
| H3K4    | 0.337 | 0      | 0.202  | 0.282 | 0.282 | 0     | 0      | 0.282 | 0.282 | 0.282   | 0.282 |
| H3K9    | 0.584 | 0.239  | 0.252  | 0.269 | 0     | 0.584 | 0.212  | 0.251 | 0.584 | 0       | 0.584 |
| H3K14   | 0.177 | 0.177  | 0.403  | 0     | 0     | 0     | 0      | 0.403 | 0.177 | 0.177   | 0.403 |
| H3K18   | 0.366 | 0      | 0.484  | 0     | 0.484 | 0.439 | 0      | 0.484 | 0.484 | 0.484   | 0.484 |
| H3K23   | 0     | 0      | 0      | 0     | 0.171 | 0     | 0.171  | 0.171 | 0.171 | 0       | 0.194 |
| H3K27   | 0.513 | 0.234  | 0      | 0.236 | 0.294 | 0.294 | 0.513  | 0.513 | 0.513 | 0.513   | 0.513 |
| H3K56   | 0     | 0.387  | 0.29   | 0     | 0.387 | 0.289 | 0      | 0.387 | 0.289 | 0.3871  | 0.387 |
| H4K5    | 0.485 | 0.485  | 0.262  | 0.485 | 0.485 | 0.485 | 0      | 0.485 | 0.485 | 0.485   | 0.485 |
| H4K8    | 0.516 | 0      | 0      | 0.516 | 0.516 | 0     | 0      | 0.229 | 0.516 | 0       | 0.516 |
| H4K91   | 0.295 | 0      | 0.236  | 0.295 | 0.236 | 0.295 | 0.236  | 0.295 | 0.236 | 0.295   | 0     |

Figure S3: Relative expression of different HUB genes in the pathogenesis of AD and PD with respect to histone acetylation at particular lysine residue. Color scale goes from yellow (smaller values) to green (larger values).

SUPPLEMENTARY TABLES

Table S1: List of HUB genes identified in different PPI networks and lists of common proteins that were found in the cluster of all three PPI networks, such as AD, PD, and AD-PD union network.

| Rank                                   | HUB Genes | Alzheimer's Disease | Parkinson's Disease | Merged Network (Intersection) | Frequency |
|----------------------------------------|-----------|---------------------|---------------------|-------------------------------|-----------|
| <b>Alzheimer's Disease PPI Network</b> |           |                     |                     |                               |           |
| 1                                      | SNAP25    | Cluster 1           |                     | Cluster 1                     | 2         |
| 2                                      | CDC42     | Cluster 2           | Cluster 1           | Cluster 5                     | 3         |
| 3                                      | GRIA2     | Cluster 1           |                     | Cluster 1                     | 2         |
| 4                                      | GRM5      | Cluster 1           |                     | Cluster 1                     | 2         |
| 5                                      | GRIA1     | Cluster 1           |                     | Cluster 1                     | 2         |
| 6                                      | CAMK2A    | Cluster 1           |                     | Cluster 1                     | 2         |
| 7                                      | GABRG2    | Cluster 1           |                     | Cluster 1                     | 2         |
| 8                                      | SYT1      | Cluster 1           |                     | Cluster 1                     | 2         |
| 9                                      | NRXN1     | Cluster 1           |                     | Cluster 2                     | 2         |
| 10                                     | SYP       | Cluster 1           |                     | Cluster 1                     | 2         |
| 11                                     | GFAP      | Cluster 1           |                     | Cluster 1                     | 2         |
| 12                                     | CALM1     | Cluster 1           |                     | Cluster 1                     | 2         |
| 13                                     | GAP43     | Cluster 1           |                     | Cluster 1                     | 2         |
| 14                                     | SLC17A7   | Cluster 1           |                     | Cluster 1                     | 2         |
| 15                                     | PLCB1     | Cluster 1           |                     | Cluster 1                     | 2         |
| <b>Parkinson's Disease PPI Network</b> |           |                     |                     |                               |           |
| 1                                      | TP53      |                     | Cluster 1           | Cluster 3                     | 2         |
| 2                                      | ACTB      |                     | Cluster 1           | Cluster 3                     | 2         |
| 3                                      | HRAS      |                     | Cluster 1           | Cluster 3                     | 2         |
| 4                                      | CDC42     | Cluster 2           | Cluster 1           | Cluster 5                     | 3         |
| 5                                      | CAT       |                     | Cluster 1           | Cluster 3                     | 2         |
| 6                                      | EEF2      |                     | Cluster 1           | Cluster 3                     | 2         |

|                                       |         |           |           |           |   |
|---------------------------------------|---------|-----------|-----------|-----------|---|
| 7                                     | PRKACA  |           | Cluster 1 | Cluster 3 | 2 |
| 8                                     | ACTG1   |           | Cluster 1 | Cluster 3 | 2 |
| 9                                     | TUBB    |           | Cluster 1 | Cluster 3 | 2 |
| 10                                    | MDM2    |           | Cluster 1 | Cluster 3 | 2 |
| 11                                    | GART    |           | Cluster 1 | Cluster 3 | 2 |
| 12                                    | TUBB4B  | Cluster 3 | Cluster 1 | Cluster 3 | 3 |
| 13                                    | SMARCA4 |           | Cluster 1 | Cluster 3 | 2 |
| 14                                    | TUFM    |           | Cluster 1 | Cluster 3 | 2 |
| 15                                    | EIF4E   |           | Cluster 1 | Cluster 3 | 2 |
| <b>AD-PD Union PPI Network</b>        |         |           |           |           |   |
| 1                                     | CDC42   | Cluster 2 | Cluster 1 | Cluster 5 | 3 |
| 2                                     | TP53    |           | Cluster 1 | Cluster 3 | 2 |
| 3                                     | SNAP25  | Cluster 1 |           | Cluster 1 | 2 |
| 4                                     | GRIA2   | Cluster 1 |           | Cluster 1 | 2 |
| 5                                     | GRM5    | Cluster 1 |           | Cluster 1 | 2 |
| 6                                     | GRIA1   | Cluster 1 |           | Cluster 1 | 2 |
| 7                                     | CAMK2A  | Cluster 1 |           | Cluster 1 | 2 |
| 8                                     | GABRG2  | Cluster 1 |           | Cluster 1 | 2 |
| 9                                     | CD44    | Cluster 3 | Cluster 1 | Cluster 1 | 3 |
| 10                                    | NRXN1   | Cluster 1 |           | Cluster 1 | 2 |
| 11                                    | SYT1    | Cluster 1 |           | Cluster 1 | 2 |
| 12                                    | SYP     | Cluster 1 |           | Cluster 1 | 2 |
| 13                                    | GFAP    | Cluster 1 |           | Cluster 1 | 2 |
| 14                                    | CALM1   | Cluster 4 |           | Cluster 1 | 2 |
| 15                                    | ACTB    |           | Cluster 1 | Cluster 3 | 2 |
| <b>AD-PD Intersection PPI Network</b> |         |           |           |           |   |
| 1                                     | CDC42   | Cluster 2 | Cluster 1 | Cluster 5 | 3 |
| 2                                     | CD44    | Cluster 3 | Cluster 1 | Cluster 1 | 3 |
| 3                                     | FGFR1   | Cluster 4 | Cluster 1 | Cluster 3 | 3 |
| 4                                     | MYO5A   | Cluster 4 | Cluster 1 | Cluster 1 | 3 |
| 5                                     | NUMA1   | Cluster 3 | Cluster 1 | Cluster 3 | 3 |
| 6                                     | TUBB4B  | Cluster 3 | Cluster 1 | Cluster 3 | 3 |
| 7                                     | ARHGEF9 | Cluster 1 | Cluster 1 | Cluster 1 | 3 |
| 8                                     | CDS2    |           |           |           | 0 |
| 9                                     | KATNB1  |           | Cluster 1 | Cluster 3 | 2 |
| 10                                    | USP5    | Cluster 1 | Cluster 3 | Cluster 1 | 3 |
| 11                                    | PKP4    | Cluster 3 |           | Cluster 3 | 2 |
| 12                                    | NFIA    | Cluster 1 | Cluster 2 | Cluster 1 | 3 |
| 13                                    | APLNR   | Cluster 2 |           | Cluster 3 | 2 |
| 14                                    | INPP5D  | Cluster 3 | Cluster 1 | Cluster 3 | 3 |
| 15                                    | NUP93   | Cluster 2 | Cluster 2 | Cluster 2 | 3 |

Table S2: Prediction of putative lysine residues and HDAC enzymes in the CREB1

| <b>MuSite Deep / Deep-PLA</b> |       |            |       |         |
|-------------------------------|-------|------------|-------|---------|
| Residue                       | Score | Confidence | Type  | FPR (%) |
| 91                            | 0.25  | Low        | SIRT7 | 14.7    |
| 94                            | 0.166 | Low        | SIRT7 | 13.26   |
| 123                           | 0.12  | Low        | HDAC6 | 2.74    |
| 136                           | 0.309 | Moderate   | SIRT1 | 0.03    |
| 155                           | 0.162 | Low        | SIRT1 | 3.35    |
| 285                           | 0.129 | Low        | SIRT7 | 9.68    |
| 292                           | 0.139 | Low        | HDAC1 | 4.96    |
| 303                           | 0.114 | Low        | SIRT7 | 12.54   |
| 304                           | 0.133 | Low        | SIRT7 | 12.9    |
| 305                           | 0.185 | Low        | SIRT7 | 13.98   |
| 309                           | 0.29  | Moderate   | ----  | ----    |
| 323                           | 0.318 | Moderate   | ----  | ----    |
| 330                           | 0.557 | High       | HDAC2 | 10.67   |
| 333                           | 0.288 | Moderate   | SIRT6 | 6.92    |



| 339                          | 0.199 | Low        | SIRT6 | 2.31    |
|------------------------------|-------|------------|-------|---------|
| <b>PSKAcePred / Deep-PLA</b> |       |            |       |         |
| Residue                      | Score | Confidence | Type  | FPR (%) |
| 91                           | 0.692 | Moderate   | SIRT7 | 14.7    |
| 94                           | 0.872 | High       | SIRT7 | 13.26   |
| 136                          | 0.659 | Moderate   | SIRT1 | 0.03    |
| 292                          | 0.737 | High       | HDAC1 | 3.35    |
| 303                          | 0.856 | High       | SIRT7 | 12.54   |
| 304                          | 0.924 | High       | SIRT7 | 12.9    |
| 305                          | 0.653 | Moderate   | SIRT7 | 13.98   |
| 309                          | 0.994 | High       | ----  | ----    |

Table S3: Prediction of putative lysine residues and HDAC enzymes in the HINFP

| <b>MuSite Deep / Deep-PLA</b> |       |            |       |         |
|-------------------------------|-------|------------|-------|---------|
| Residue                       | Score | Confidence | Type  | FPR (%) |
| 6                             | 0.318 | Moderate   | HDAC6 | 2.74    |
| 10                            | 0.164 | Low        | HDAC6 | 3.84    |
| 31                            | 0.163 | Low        | SIRT1 | 6.51    |
| 94                            | 0.176 | Low        | ----  | ----    |
| 96                            | 0.159 | Low        | ----  | ----    |
| 164                           | 0.206 | Low        | SIRT3 | 14.56   |
| 174                           | 0.191 | Low        | SIRT7 | 13.26   |
| 181                           | 0.182 | Low        | ----  | ----    |
| 185                           | 0.177 | Low        | SIRT3 | 14.94   |
| 197                           | 0.168 | Low        | ----  | ----    |
| 213                           | 0.311 | Moderate   | ----  | ----    |
| 236                           | 0.189 | Low        | ----  | ----    |
| 256                           | 0.191 | Low        | ----  | ----    |
| 285                           | 0.174 | Low        | ----  | ----    |
| 294                           | 0.186 | Low        | ----  | ----    |
| 301                           | 0.21  | Low        | ----  | ----    |
| 330                           | 0.42  | Moderate   | HDAC6 | 3.84    |
| 335                           | 0.198 | Low        | HDAC6 | 2.74    |
| 346                           | 0.178 | Low        | HDAC6 | 6.3     |
| 352                           | 0.228 | Low        | HDAC3 | 8.6     |
| 366                           | 0.175 | Low        | HDAC1 | 5.8     |
| 367                           | 0.157 | Low        | HDAC1 | 4.23    |
| 371                           | 0.354 | Moderate   | SIRT1 | 7.01    |
| 382                           | 0.269 | Moderate   | HDAC1 | 6.53    |
| 439                           | 0.153 | Low        | SIRT2 | 4.77    |
| 446                           | 0.11  | Low        | SIRT2 | 0.95    |
| 504                           | 0.154 | Low        | SIRT1 | 6       |
| <b>PSKAcePred / Deep-PLA</b>  |       |            |       |         |
| Residue                       | Score | Confidence | Type  | FPR (%) |
| 31                            | 0.73  | High       | SIRT1 | 6.51    |

|     |       |          |       |       |
|-----|-------|----------|-------|-------|
| 96  | 0.766 | High     | ----  | ----  |
| 174 | 0.779 | High     | SIRT7 | 13.26 |
| 185 | 0.591 | Moderate | SIRT3 | 14.94 |
| 197 | 0.65  | Moderate | ----  | ----  |
| 213 | 0.616 | Moderate | ----  | ----  |
| 236 | 0.522 | Moderate | ----  | ----  |
| 330 | 0.726 | High     | HDAC6 | 3.84  |
| 335 | 0.93  | High     | HDAC6 | 2.74  |
| 352 | 0.5   | Moderate | HDAC3 | 8.6   |
| 366 | 0.629 | Moderate | HDAC1 | 5.8   |
| 367 | 0.904 | High     | HDAC1 | 4.23  |
| 371 | 0.911 | High     | SIRT1 | 7.01  |
| 446 | 0.719 | High     | SIRT2 | 0.95  |
| 504 | 0.506 | Moderate | SIRT1 | 6     |

Table S4: Secondary structure of the protein acetylation sites predicted by PSIPRED: protein structure prediction server

| CREB1   |                                |            | HNIFP   |                                |            |         |                                |            |
|---------|--------------------------------|------------|---------|--------------------------------|------------|---------|--------------------------------|------------|
| Residue | Structure Prediction (PSIPRED) | Score (10) | Residue | Structure Prediction (PSIPRED) | Score (10) | Residue | Structure Prediction (PSIPRED) | Score (10) |
| 91      | Coil                           | 4          | 6       | Coil                           | 9          | 301     | Helix                          | 9          |
| 94      | Strand                         | 3          | 10      | Coil                           | 8          | 330     | Helix                          | 3          |
| 123     | Helix                          | 8          | 31      | Helix                          | 6          | 335     | Coil                           | 5          |
| 136     | Helix                          | 9          | 94      | Coil                           | 8          | 346     | Strand                         | 4          |
| 155     | Coil                           | 5          | 96      | Coil                           | 1          | 352     | Coil                           | 9          |
| 285     | Helix                          | 9          | 164     | Coil                           | 8          | 366     | Helix                          | 3          |
| 292     | Helix                          | 9          | 174     | Coil                           | 9          | 367     | Coil                           | 1          |
| 303     | Helix                          | 9          | 181     | Coil                           | 4          | 371     | Coil                           | 9          |
| 304     | Helix                          | 9          | 185     | Coil                           | 1          | 382     | Coil                           | 4          |
| 305     | Helix                          | 9          | 197     | Coil                           | 9          | 439     | Helix                          | 6          |
| 309     | Helix                          | 9          | 213     | Coil                           | 6          | 446     | Coil                           | 9          |
| 323     | Helix                          | 9          | 236     | Coil                           | 8          | 504     | Helix                          | 9          |
| 330     | Helix                          | 9          | 256     | Coil                           | 8          |         |                                |            |
| 333     | Helix                          | 9          | 285     | Coil                           | 5          |         |                                |            |
| 339     | Coil                           | 0          | 294     | Strand                         | 1          |         |                                |            |
